# Supplementary material for: Exploration of implementation, financial and technical considerations within allied health professional (AHP) telehealth consultation guidance: a scoping review including UK AHP professional bodies’ guidance
Source: HighWire-hosted journal article supplement (doi:10.1136/bmjopen-2021-055823), 2021-12-01
Supplement: bmjopen-2021-055823supp003_data_supplement.pdf [file bmjopen-2021-055823supp003_data_supplement.pdf]

**Supplementary file 3. Patient's eligibility criteria for telehealth consultation reported in the articles/guidelines included in the review.**

| <b>Patient eligibility criteria</b>                                                               | <b>Authors</b>                                                                                                             |
|---------------------------------------------------------------------------------------------------|----------------------------------------------------------------------------------------------------------------------------|
| Diagnosis and clinical presentation<br>complexity                                                 | Jacobs et al. (1), Bierman et al. (2), Ben-Aharon et al. (3)                                                               |
| Age                                                                                               | Ben-Aharon et al. (3), Doll et al. (4)                                                                                     |
| Language skills and cultural background                                                           | Collie et al. (5), Simila et al. (6), World Federation of Occupational Therapists (7), Jacobs et al. (1), Burns et al. (8) |
| Hearing and visual abilities                                                                      | Burns et al. (8)                                                                                                           |
| Physical function                                                                                 | Denton et al. (9), Burns et al. (8), Quigley et al. (10), Wong et al. (11)                                                 |
| Cognitive function                                                                                | Denton et al. (9), Burns et al. (8), Middleton et al. (12), Quigley et al. (10), Doll et al. (4)                           |
| Mental health status                                                                              | Collie et al. (5), NHS England and NHS Improvement (13)                                                                    |
| Sufficient technological skills                                                                   | Collie et al. (5), Jacobs et al. (1), Middleton et al. (12), Wong et al. (11)                                              |
| Availability of technology devices and access to internet                                         | Wong et al. (11), Collie et al. (5), Middleton et al. (12), Doll et al. (4)                                                |
| Willingness to participate to remote consultations                                                | Denton et al. (9), Burns et al. (8)                                                                                        |
| Adequate home setting                                                                             | Bierman et al. (2), Middleton et al. (12)                                                                                  |
| Family's and/or caregiver' availability to provide support and facilitate consultations if needed | Burns et al. (8), Middleton et al. (12), Quigley et al. (10), Wong et al. (11)                                             |

## REFERENCE LIST

1. Jacobs K, Cason J, McCullough A. The Process for the Formulation of the International Telehealth Position Statement for Occupational Therapy. *International journal of telerehabilitation*. 2015 Jul 29;7(1):21–32.
2. Bierman RT, Kwong MW, Calouro C. State Occupational and Physical Therapy Telehealth Laws and Regulations: A 50-State Survey. *International journal of telerehabilitation*. 2018 Dec 11;10(2):3–54.
3. Ben-Aharon A. A Practical Guide to Establishing an Online Speech Therapy Private Practice. *Perspectives of the ASHA Special Interest Groups*. 2019 Aug;4(4):712–8.
4. Doll EJ, Braden MN, Thibeault SL. COVID-19 and Speech-Language Pathology Clinical Practice of Voice and Upper Airway Disorders. *American journal of speech-language pathology*. 2021 Jan 27;30(1):63–74.
5. Collie K, Bottorff JL, Long BC, et al. Distance art groups for women with breast cancer: guidelines and recommendations. *Supportive care in cancer: official journal of the Multinational Association of Supportive Care in Cancer*. 2006 Aug;14(8):849–58.
6. Simila H, Harjumaa M, Isomursu M, Ervasti M, Moilanen H. Video Communication in Remote Rehabilitation and Occupational Therapy Groups. *Physical & Occupational Therapy in Geriatrics*. 2014 Jun;32(2):97–111.
7. World Federation Of Occupational Therapists. World Federation of occupational therapists' position statement on telehealth. *International journal of telerehabilitation*. 2014 Sep 3;6(1):37–9.

8. Burns CL, Wall LR. Using Telepractice to Support the Management of Head and Neck Cancer: Key Considerations for Speech-Language Pathology Service Planning, Establishment, and Evaluation. *Perspectives of the ASHA Special Interest Groups*. 2017 Sep;2(13):139–46.
9. Denton DR. Ethical and legal issues related to telepractice. *Seminars in speech and language*. 2003 Nov;24(4):313–22.
10. Quigley A, Johnson H, McArthur C. Transforming the Provision of Physiotherapy in the Time of COVID-19: A Call to Action for Telerehabilitation. *Physiotherapy Canada*. 2021;73(1):1–2.
11. Wong A, Bhyat R, Srivastava S, et al. Patient Care During the COVID-19 Pandemic: Use of Virtual Care. *Journal of medical Internet research*. 2021 Jan 21;23(1):e20621.
12. Middleton A, Simpson KN, Bettger JP, et al. COVID-19 Pandemic and Beyond: Considerations and Costs of Telehealth Exercise Programs for Older Adults With Functional Impairments Living at Home-Lessons Learned From a Pilot Case Study. *Physical therapy*. 2020 Aug 12;100(8):1278–88.
13. NHS England and NHS Improvement. Novel coronavirus (COVID-19) standard operating procedure: Community health services NHS England and NHS Improvement. 2020.
